1 **Traces of pubertal brain development and health revealed through domain**  
2 **adapted brain network fusion**

3  
4  
5  
6  
7  
8  
9

Dominik Kraft<sup>1</sup>, Dag Alnæs<sup>2, 3</sup>, Tobias Kaufmann<sup>1, 2, 4</sup>

10 <sup>1</sup> Department of Psychiatry and Psychotherapy, Tübingen Center for Mental Health,  
11 University of Tübingen, Tübingen, Germany

12 <sup>2</sup> Norwegian Centre for Mental Disorders Research, University of Oslo and Oslo  
13 University Hospital, Oslo, Norway

14 <sup>3</sup> Kristiania University College, Oslo, Norway

15 <sup>4</sup> German Center for Mental Health (DZPG), Germany

16  
17  
18  
19

20 Address for correspondence:

21

22 Dominik Kraft, Dr.

23 [Dominik.Kraft@med.uni-tuebingen.de](mailto:Dominik.Kraft@med.uni-tuebingen.de)

24

25 Tobias Kaufmann, Prof. Dr.

26 [Tobias.Kaufmann@med.uni-tuebingen.de](mailto:Tobias.Kaufmann@med.uni-tuebingen.de)

27

28 Department of Psychiatry and Psychotherapy

29 Tübingen Center for Mental Health

30 University of Tübingen

31 Tübingen, Germany

32

33

34

35

36

37

38 **Keywords:** Brain development, puberty, mental health, similarity network fusion,

39 diffusion map embedding, domain adaptation

40

41 \_\_\_ Major changes marked in green color

## 42 **Abstract**

43  
44 Puberty demarks a period of profound brain dynamics that orchestrates changes to a  
45 multitude of neuroimaging-derived phenotypes. This poses a dimensionality problem  
46 when attempting to chart an individual's brain development on a single scale. Here, we  
47 illustrate shifts in subject similarity of imaging data that relate to pubertal maturation  
48 and altered mental health, suggesting that dimensional reference spaces of subject  
49 similarity render useful to chart brain dynamics in youths.

50  
51

## 52 **Introduction**

53  
54 Recent availability of big data in the neurosciences and sparking technical advances  
55 have opened doors toward a system level understanding of high-dimensional,  
56 multimodal data, integrating information from genetic, behavioral and neuroimaging  
57 sources, amongst others<sup>1</sup>. Such deep phenotyping avenues are holding great promise  
58 to unravel the complexity and heterogeneity of mental disorders, where a multitude of  
59 factors have been identified as contributors to the risk architectures and clinical  
60 phenotypes<sup>2-4</sup>. Multimodal big data, however comes with the curse of dimensionality<sup>5</sup>  
61 or hurdles regarding how to efficiently and effectively integrate different information  
62 sources in biologically meaningful manners<sup>6,7</sup>.

63  
64 Previous research has approached the task of data integration from various angles,  
65 from data concatenation to sophisticated modelling<sup>7</sup> such as similarity network fusion  
66 (SNF<sup>8</sup>). First application attempts of SNF to common brain disorders have illustrated  
67 its potential for deriving insights from heterogeneous populations such as those with  
68 psychiatric (e.g.<sup>9</sup>) or neurological (e.g.<sup>6</sup>) disorders. SNF is an unsupervised technique  
69 that integrates unique and complementary information from different data sources,  
70 thus placing individuals in a comprehensive and biologically informed feature space,  
71 which is defined by the similarity between subjects across all data modalities. To  
72 achieve this, SNF exploits the covariance between data modalities. Subsequent  
73 dimensionality reduction methods such as diffusion map embedding<sup>10</sup> may reveal  
74 dominant axes of inter-subject similarity on which subjects can be localized by a single  
75 score.

76 Similar attempts of charting an individual's position on a data continuum have recently  
77 shown success in psychiatry, where mapping dimensions of psychopathology can  
78 yield advantages over categorical systems<sup>e.g.,11,12</sup>.

79  
80 A key challenge in dimensions that are based on inter-subject similarity is that newly  
81 added samples can inevitably result in a change to the overall similarity structure.  
82 Consequently, the score that localizes an individual on the dimension is not stable as  
83 would be desirable in biomarker utilities, thus marking a disadvantage compared to  
84 other data-derived markers such as polygenic risk scores or measures of brain  
85 structure. To overcome this, we here propose a machine learning (ML) framework that  
86 learns the mapping from raw structural MRI features to the low dimensional brain  
87 embedding score and through supervised domain adaptation allows to transfer this  
88 mapping into new datasets without the need to recalculate the fused network. Figure  
89 1A describes the framework schematically. Our approach comes with advantages over  
90 modeling fused networks independently for individual datasets and timepoints: First,  
91 our ML model establishes a subject similarity reference space in an independent  
92 training sample, allowing for robust predictions at an individual subject's level in  
93 unseen data. Second, domain adaptation offers flexibility to adapt the model to other  
94 datasets that have unique characteristics, such as repeated measures in a longitudinal  
95 design or heterogeneity that is commonly found in patient samples. To this end, we  
96 trained our model in the Philadelphia Neurodevelopmental Cohort (PNC)<sup>13</sup> and  
97 withheld data from the target datasets that was used for domain adaptation. We  
98 validated our approach in an unseen longitudinal sample from the Adolescent Brain  
99 Cognitive Development (ABCD) Study<sup>14</sup> and on a clinical population of subjects from  
100 the Healthy Brain Network (HBN)<sup>15</sup> sample. Both datasets allow to investigate unique  
101 processes shaping the human brain in development, specifically pubertal maturation,  
102 and emerging psychopathology.

103  
104 Puberty depicts a phase of biological and psychological changes potentially mediated  
105 by neurodevelopment beyond the effect of age<sup>16-18</sup>. Variables assessing pubertal  
106 status can thus be more sensitive measures than age for studying brain maturation in  
107 youth (e.g.,<sup>19</sup>). Previous work revealed global reductions in cortical grey matter  
108 volumes and thickness with advanced pubertal maturation, with evidence from both,

109 cross-sectional and longitudinal data. These effects appear to be distributed across  
110 the whole cortex rather than being circumscribed to a specific set of regions (see <sup>17</sup> for  
111 a review). However, as different studies use different approaches to account for age  
112 and sex, inconsistencies exist in terms of effect sizes and effect directions, including  
113 those of opposing effect directions in males and females<sup>20,21</sup>. These conflicting  
114 observations might arise from certain methodological choices but also from individual  
115 variability in pubertal timing and progression through maturational stages. While all  
116 adolescents undergo the same pubertal stages, there is quite some variability  
117 regarding pubertal onset and tempo of changes, which has been linked to mental  
118 health conditions<sup>22–24</sup>. In females, earlier pubertal timing appears to be associated to  
119 worse mental health conditions (e.g.,<sup>22,25</sup>), while for boys both very early and very late  
120 onset has been linked to worse psychological outcome (e.g.,<sup>26,27</sup>).

121

122 Given the close interplay between pubertal maturation, brain development and its link  
123 to emerging psychopathology, we aimed at investigating the sensitivity of brain  
124 embeddings toward these two entities. We show that our model can reveal traces of  
125 pubertal brain development and allows to capture biological variance related to  
126 emerging psychopathology, suggesting its utility in investigating within-person  
127 changes in youths.

128

129

130

131

132

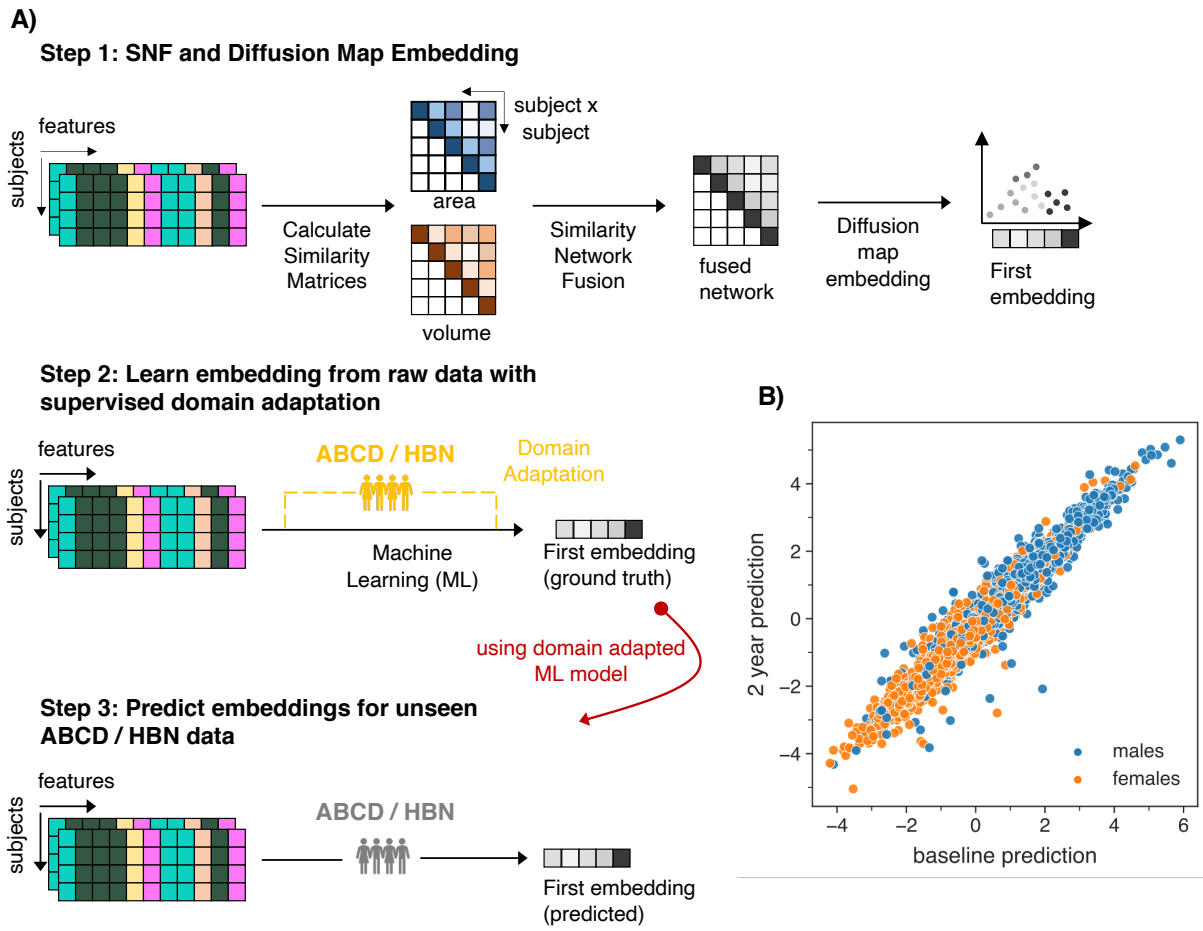

133  
 134 Figure 1. Inferring a reference space using domain adaptation on brain network embeddings. A)  
 135 Schematic workflow of the prediction framework. Step 1: Similarity network fusion is followed by diffusion  
 136 map embedding to extract individual subject scores of the first brain embedding. Step 2: A machine  
 137 learning model is trained to learn the mapping between raw features and the first brain embedding score.  
 138 Using domain adaptation, held-out subsets of the target data (yellow) from ABCD or HBN are added to  
 139 the training, respectively. Step 3: Such domain adaptation enhances out of sample prediction for unseen  
 140 (grey) data in both datasets. B) Predicted brain embeddings for the ABCD baseline (x-axis) and 2-years  
 141 follow-up (y-axis) data reveal a sex gradient. PNC: Philadelphia Neurodevelopmental Cohort, ABCD:  
 142 Adolescent Brain Cognitive Development, HBN: Healthy Brain Network.

143

144

## 145 Results

### 146 Model Performance

147 We applied SNF with subsequent diffusion map embedding to data from N=1594  
 148 individuals spanning a wide developmental age range (8 – 21 years, PNC<sup>13</sup>).

149 Akin to other dimensionality reduction approaches, the first brain embedding captures  
 150 most variance and was therefore used to build the reference space, referred to as brain

151 embedding. We trained a machine learning model with an instance-based domain  
 152 adaptation procedure (Transfer AdaBoost for Regression)<sup>28</sup> in a combined sample  
 153 comprising the PNC sample and held-out data from ABCD or HBN to learn the  
 154 mapping between raw MRI features – specifically cortical area and volume - and the  
 155 brain embedding. This yielded a domain adapted reference model that could be  
 156 applied to independent data in the ABCD and HBN samples. For the ABCD test  
 157 sample, we applied the model on baseline and 2-years follow-up data, yielding two  
 158 predictions per participant. For the cross-sectional HBN sample, the model yielded one  
 159 prediction per participant. Model performance was calculated by comparing the  
 160 predicted brain embeddings in the ABCD and HBN dataset to the ‘ground truth’ brain  
 161 embeddings after performing SNF and diffusion map embedding on the respective test  
 162 datasets. Our model achieved high performance in unseen data, both for the ABCD  
 163 and HBN sample (Table 1). Brain maps illustrating the associations between brain  
 164 embeddings and raw features showed similar patterns in both samples  
 165 (Supplementary Fig. 1). Model performance was better in the ABCD sample, which  
 166 might be driven by the fact, that the sample for domain adaptation in the ABCD dataset  
 167 was approximately 5x larger than the one used for HBN, allowing for a more efficient  
 168 shift towards the target distribution. Furthermore, the HBN set comprised data from  
 169 patients, thus the lower accuracy may to some degree also reflect pathological  
 170 variance. Moreover, within the ABCD sample, baseline performance was slightly better  
 171 compared to the follow-up data, since the data used for domain adaptation was also  
 172 from the baseline study visit. Given successful performance of the model, we  
 173 proceeded to validating the biological signal in the predictions.

174

175 Table 1. Model performance for unseen data in the ABCD and HBN sample.

|                           | <b>RMSE</b> | <b>MAE</b> | <b>R<sup>2</sup></b> | <b>r</b> |
|---------------------------|-------------|------------|----------------------|----------|
| ABCD <sub>baseline</sub>  | .95         | .85        | .79                  | .94      |
| ABCD <sub>follow-up</sub> | 1.02        | .91        | .78                  | .94      |
| HBN                       | 1.50        | .95        | .65                  | .92      |

176 Note: RMSE= root-mean-squared error, MAE= mean absolute error, R<sup>2</sup>= coefficient of determination,  
 177 r= Pearson correlation coefficient.

178

179

180 *Biological validation of the model*

181 We validated the biological utility of the predictions in capturing developmental brain  
182 dynamics by targeting puberty and mental health as two phenotypes that are closely  
183 related to each other. They both lay off their dynamics during adolescence and  
184 therefore are also intertwined with (developmental) brain trajectories<sup>24,29</sup>. We  
185 hypothesized that these phenotypes should be related to our brain embedding score.  
186 To assess the models` ability to capture variance cross-sectionally, we first calculated  
187 puberty associations for both timepoints and their respective brain embeddings in the  
188 ABCD sample, accounting the statistical model for age and scan site. We observed  
189 associations between the average puberty score measured with the Pubertal  
190 Development Scale (PDS)<sup>30</sup> and the predicted brain embedding at both timepoints for  
191 the caregiver reports (baseline<sub>female</sub>:  $b = -.34$ ,  $p = 6.88 \times 10^{-16}$ ,  $\eta^2 = .02$ ,  $N = 3344$ ;  
192 baseline<sub>male</sub>:  $b = -.36$ ,  $p = 5.53 \times 10^{-10}$ ,  $\eta^2 = 0.01$ ,  $N = 3920$ ; follow-up<sub>female</sub>:  $b = -.27$ ,  $p =$   
193  $1.94 \times 10^{-15}$ ,  $\eta^2 = .03$ ,  $N = 3316$ ; follow-up<sub>male</sub>:  $b = -.17$ ,  $p = 1.39 \times 10^{-15}$ ,  $\eta^2 = .008$ ,  
194  $N = 3910$ ). In youth reports we observed similar effects although some did not survive  
195 Bonferroni correction (baseline<sub>female</sub>:  $b = -.17$ ,  $p = .005$ ,  $\eta^2 = .006$ ,  $N = 1479$ ; baseline<sub>male</sub>:  
196  $b = -.06$ ,  $p = .34$ ,  $\eta^2 = .0005$ ,  $N = 2264$ ; follow-up<sub>female</sub>:  $b = -.20$ ,  $p = 2.66 \times 10^{-9}$ ,  $\eta^2 = .02$ ,  
197  $N = 3271$ ; follow-up<sub>male</sub>:  $b = -.14$ ,  $p = .0003$ ,  $\eta^2 = .006$ ,  $N = 4056$ ; see Figure 2). Aiming at  
198 replicating these puberty associations in the clinical HBN sample, we performed two  
199 additional analyses in which we subsampled the HBN sample to the age of the ABCD  
200 baseline and the ABCD follow-up data. Calculating the same cross-sectional puberty  
201 models in these HBN subsets did not yield statistically significant results  
202 (Supplementary Table 2).

203

204 Beyond the cross-sectional associations, the framework allows to apply the model to  
205 longitudinal data of the same subjects and investigate change scores between  
206 timepoints, as the predicted brain embedding is modeled with respect to the reference  
207 and thus remains stable compared to fused networks derived from individual  
208 timepoints, which might introduce additional variance when computing the difference  
209 score. Accordingly, we argue that the difference between two predicted brain  
210 embeddings ( $\Delta$  brain embedding) is capable of tracing brain trajectories and thus may  
211 serve as a marker for brain dynamics. Hence, we were particularly interested whether  
212 the  $\Delta$  brain embedding captures biologically meaningful pubertal variance and is thus

213 sensitive to biologically relevant processes shaping the human brain. Consequently,  
214 we repeated the linear models with  $\Delta$  brain embedding as dependent and the  $\Delta$ PDS  
215 scores (i.e., the puberty difference between baseline and 2-years follow up) as  
216 independent variable (caregiver report: female mean= 0.77, male mean= 0.38, youth  
217 report: female mean= 0.70, male mean= 0.21). For age adjustment of this longitudinal  
218 analysis, we included the age difference between baseline and the 2 years follow-up  
219 ( $\Delta$ age) as a covariate.

220 Whereas cross-sectional effect sizes were comparable between sexes across both  
221 timepoints, change association appeared to be more pronounced in females. For  
222 females we observed significant associations between  $\Delta$ PDS and  $\Delta$  brain embedding  
223 for both caregiver ( $b= -.06$ ,  $p = 2.37 \times 10^{-10}$ ,  $\eta^2= .02$ ,  $N= 3135$ ) and youth report ( $b= -$   
224  $.08$ ,  $p = 3.79 \times 10^{-11}$ ,  $\eta^2= .04$ ,  $N= 1375$ ) whereas for males, associations did not pass  
225 adjustment for multiple comparison (Bonferroni-adjusted  $\alpha = .05/12 = .004$ ; caregiver:  
226  $b= .01$ ,  $p = .19$ ,  $\eta^2= .0002$ ,  $N= 3700$ ; youth:  $b= .01$ ,  $p = .36$ ,  $\eta^2= .0003$ ,  $N= 2204$ ; see  
227 Figure 2). These effects for females were even more pronounced after controlling for  
228 baseline puberty status (caregiver:  $b= -.08$ ,  $p= 7.88 \times 10^{-20}$ ,  $\eta^2= .02$ , youth:  $b= -.11$ ,  $p=$   
229  $2.38 \times 10^{-18}$ ,  $\eta^2= .04$ ). It is worth noting that whereas age explained some variance in  
230 the brain embedding scores, significant pubertal effects were always larger than the  
231 respective age effects (Supplementary Table 1), supporting that the brain embedding  
232 captures variance relevant to pubertal development beyond age related brain changes.  
233 After accounting for Body Mass Index (BMI), socioeconomic status (SES), and  
234 race/ethnicity in the puberty association models, associations between  $\Delta$ PDS and  $\Delta$   
235 brain embedding remained significant whereas cross-sectional associations did not  
236 (Supplementary Fig. 2 for methodological details and Supplementary Table 1 for exact  
237 model outcomes), further supporting sensitivity of the approach to longitudinal  
238 contexts.

239

240



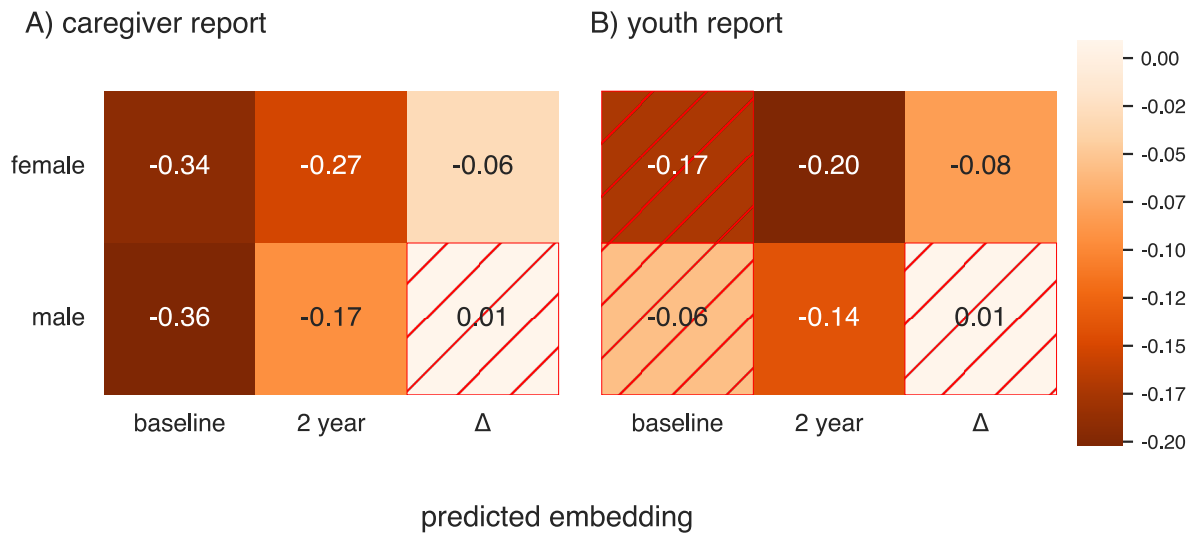

241  
 242 Figure 2. Associations between brain embeddings and puberty, both in cross-sectional and  
 243 longitudinal data. First two columns in A) and B) refer to associations between predicted brain  
 244 embeddings and the respective pubertal score (PDS mean) per timepoint.  $\Delta$  refers to the  
 245 association between the  $\Delta$  brain embedding and the  $\Delta$ PDS mean score. Annotations refer to effect  
 246 sizes and hashed cells indicate non-significant results.

247  
 248 Related, we observed that  $\Delta$  brain embeddings are distributed quite equally across  
 249 males and females for early pubertal stages, whereas from the ‘midpubertal’ period  
 250 onwards distributions start to diverge with respect to earlier developmental stages but  
 251 also with respect to between group differences (Figure 3). Interestingly, deviations  
 252 between sexes get even more pronounced with females’ menarche, that marks the  
 253 onset of the late pubertal state.

254

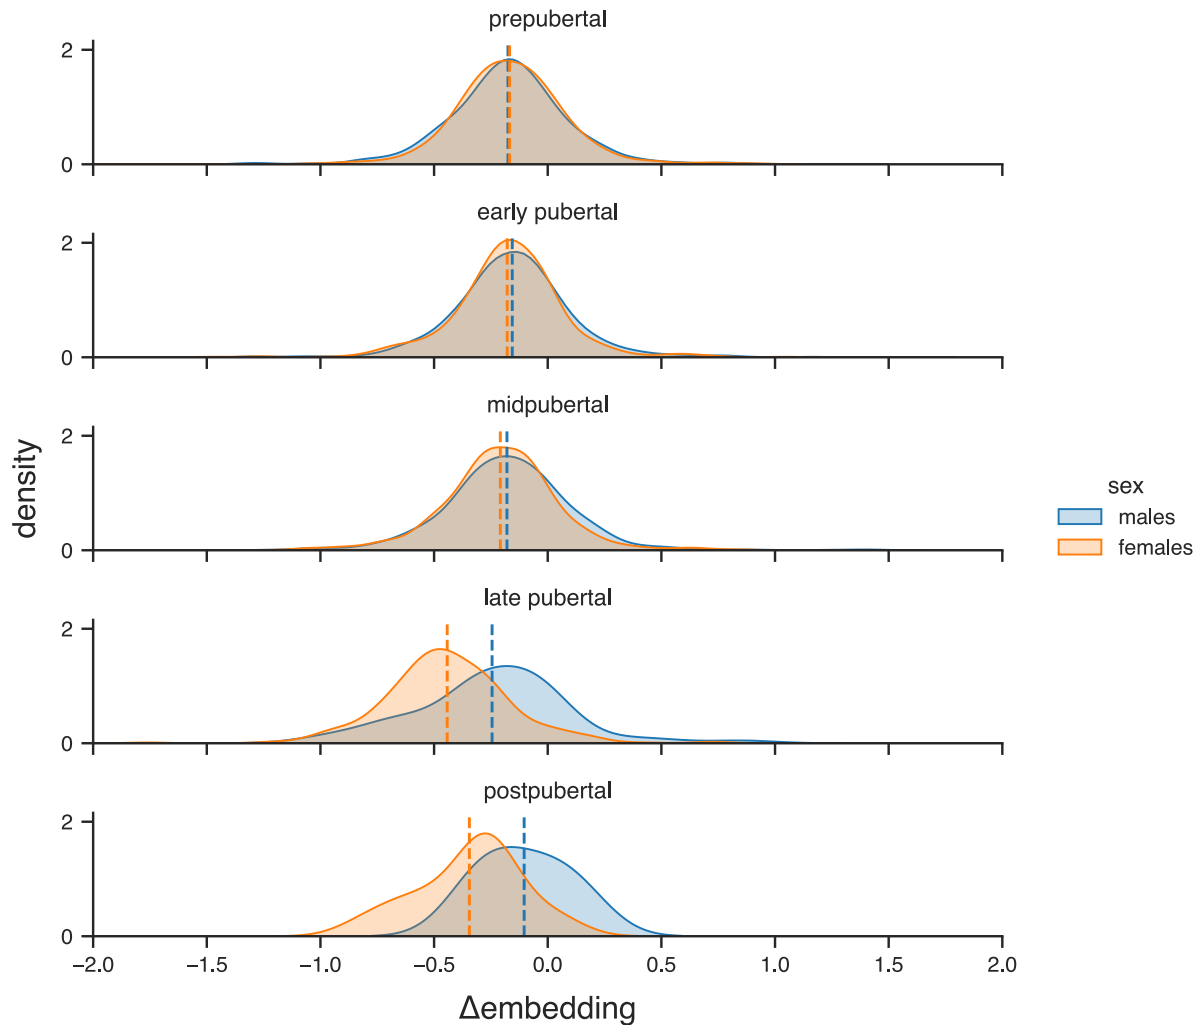

255

256 Figure 3. Distribution of  $\Delta$  brain embedding in the ABCD sample stratified for sex and pubertal  
 257 categories at one year follow up. Pubertal categories are based on youth report, but caregiver-  
 258 based categories follow the same pattern (Supplementary Fig. 3). Vertical dashed lines indicate  
 259 the mean  $\Delta$  brain embedding per group.

260

261 Puberty and adolescence depict a time of cascading changes ranging from biological,  
 262 emotional to social domains and this phase of transition also constitutes a sensitive  
 263 and critical period for emerging psychopathology and mental disorders<sup>24,31,32</sup>.  
 264 Assuming that mental disorders emerge as deviations from a brain 'norm'<sup>33</sup> we argue  
 265 that our approach of modeling the low dimensional representation anchored to a  
 266 population sample may allow to exploit the resulting reference space (i.e., the brain  
 267 embedding) in a normative fashion. To validate this, we tested in a sample of patients  
 268 drawn from the HBN<sup>15</sup> cohort for associations between the predicted brain embedding  
 269 score and mental health. We calculated a proxy measure for psychopathology severity,  
 270 that is the sum of all diagnoses per subject. Participants had between 1 and 10

271 diagnoses (mean<sub>male</sub>= 2.71, std<sub>male</sub>= 1.62, mean<sub>female</sub>= 2.71, std<sub>female</sub>= 1.55). Using this  
272 proxy measure as independent variable together with age and site as covariates, we  
273 did not observe a significant effect of psychopathology on the brain embedding for  
274 males ( $b= .04$ ,  $p = .05$ ,  $\eta^2 = .001$ ,  $N=1487$ ), but for females the effect survived multiple  
275 comparison correction ( $b= .07$ ,  $p= .007$ ,  $\eta^2 = .007$ ,  $N=784$ ; Bonferroni-adjusted  $\alpha =$   
276  $.05/2 = .025$ ). The identified association remained significant when covarying for PDS  
277 (females:  $b= .07$ ,  $p= .01$ ,  $\eta^2 = .01$ ,  $N=589$ ), yet PDS itself was not significant in this  
278 cross-sectional sample, nor were interaction terms between puberty and  
279 psychopathology (see Suppl. Table 2 for all effects). Replacing the sum of diagnosis  
280 with a dimensional measure of psychopathology, i.e., the CBCL total score (Child-  
281 Behavior Checklist<sup>34</sup>) we replicated the effects from the previous analysis. Specifically,  
282 we did not observe a significant effect of psychopathology on the brain embedding for  
283 males ( $b= .002$ ,  $p = .06$ ,  $\eta^2 = .004$ ,  $N= 1269$ ), however, for females the effect reached  
284 statistical significance ( $b= .004$ ,  $p = .008$ ,  $\eta^2 = .01$ ,  $N= 635$ ). The identified association  
285 for psychopathology operationalized via the CBCL total score in females remained  
286 significant when controlling for puberty (PDS):  $b= .005$ ,  $p = .002$ ,  $\eta^2 = .02$ ,  $N= 471$ .  
287 Since dimensional measures of psychopathology allow to test these associations also  
288 in a non-clinical sample, we aimed at validating these findings in the cross-sectional  
289 and longitudinal data from the ABCD sample. Here, we observed significant effects (all  
290  $p < .005$ ) between the CBCL score and the brain embedding, for all cross-sectional  
291 models (males and female) and the longitudinal model in males (Supplementary Fig.  
292 4 and Supplementary Table 1 for details and exact effect sizes).

293

294

## 295 **Discussion**

296

297 The present work illustrates a proof of concept for a new approach that allows to map  
298 high dimensional brain imaging data into a low dimensional brain embedding score  
299 which can be then transferred to new datasets by means of domain adaptation and  
300 machine learning. By doing so, our framework builds upon similarity network fusion<sup>8</sup>  
301 integrating information from different data sources, but does not suffer under the  
302 instability of similarity measures and thus can be translated to datasets with unique

303 features such as longitudinal study designs or clinical cohorts without the need to  
304 recalculate a fused network in the new sample.

305

306 To validate our framework and to test its applicability to other datasets, we trained our  
307 model in a sample of subjects spanning a wide age range from the PNC cohort<sup>13</sup> with  
308 simultaneous supervised domain adaptation and tested it on two independent  
309 validation samples, that is longitudinal data from the ABCD Study<sup>14</sup> and a clinical  
310 population of subjects from the HBN sample<sup>15</sup>. Domain adaptation in both datasets  
311 was enhanced with independent data that was later not used in the prediction process,  
312 such as data from ABCD subjects for whom only baseline data was available and  
313 participants in the HBN cohort without clinical diagnoses. Model performance was high  
314 for unseen test data in both datasets, confirming the model's ability to generalize to  
315 other cohorts. Our approach thus proved useful in two unseen datasets that both  
316 displayed unique sample characteristics. We hypothesize that the good model  
317 performance also relies on choosing the PNC sample as a source task which stores a  
318 rich repertoire of (dis)similarities between participants, from which the domain  
319 adaptation procedure for the two new datasets could have benefitted. However, we  
320 consider it important to further investigate the frameworks' boundaries in terms of  
321 sample characteristics of the source and target datasets, that is, under which condition  
322 the model performance diminishes.

323

324 Beyond model building, we aimed at investigating whether brain embedding scores  
325 are sensitive to capture biologically meaningful variance in processes shaping the  
326 brain and thus may represent a useful imaging phenotype for (developmental) brain  
327 dynamics. Related to work suggesting a close link between pubertal dynamics and  
328 neurodevelopment<sup>19,29,35</sup>, we observed significant cross-sectional associations  
329 between the predicted brain embedding scores and puberty measures for all models  
330 at all timepoints except for baseline data based on youth reports, which might have  
331 been biased by the difficulty to rate one's own pubertal maturation at these early ages.  
332 Such bias appears to be particularly true for males at baseline (see Supplementary  
333 Fig. 5). In addition, we observed higher correlations between caregiver and youth  
334 reports for the 2-year follow-up, suggesting an overall better alignment between  
335 reports, potentially minimizing biases. Of note, all analyses were performed stratified

336 for sex, because the brain embeddings span a sex-gradient (see Figure 1B), and  
337 pubertal timing and trajectories are known to vary between females and males<sup>36</sup>.  
338 Moreover, for models in which we observed significant puberty effects, these effects  
339 were always larger than the respective age effects, supporting its sensitivity to puberty  
340 specific dynamics beyond age.

341

342 After adding BMI, SES, and race/ethnicity<sup>37,38</sup> as covariates into our model, cross-  
343 sectional effects diminished. This aligns with reports suggesting a close link between  
344 those factors and pubertal timing and duration (e.g., <sup>38,39</sup>). Given the high inter-  
345 correlation between the studied variables, it may be difficult to disentangle variance to  
346 distinct components. Therefore, we argue, that longitudinal analyses may help to  
347 resolve the ambiguity of the cross-sectional analyses. Since the ABCD study offers  
348 an unprecedented resource for granular investigations of child and adolescent brain  
349 and pubertal maturation, we leveraged the longitudinal data of the ABCD cohort and  
350 investigated whether the  $\Delta$  brain embedding, that is the difference between the two  
351 predicted brain embedding scores for baseline and the 2-years follow up data, can  
352 serve as an additional marker for brain trajectories. Pubertal associations with the  $\Delta$   
353 brain embeddings were significant for females, but not for males, which appeared to  
354 align with the pubertal maturation in females in the studied time period. The same  
355 pattern was observable when controlling for BMI, SES, and race/ethnicity, supporting  
356 that the reported cross-sectional puberty effects do not simply represent differences in  
357 these confounding factors either.

358 Moreover, it appears that the  $\Delta$  brain embeddings for both sexes follow a comparable  
359 distribution in early pubertal stages, whereas from females' menarche onwards, both  
360 patterns start to deviate from each other. Given the narrow age range in the ABCD  
361 study, pubertal categories may serve as a proxy for pubertal timing with females often  
362 undergoing earlier puberty. Greater pubertal stage for a given age has been related to  
363 more mature, i.e., thinner cortices (e.g. <sup>22</sup>), which might be a putative explanation for  
364 the divergence in the  $\Delta$  brain embedding. Upcoming releases of the ABCD data may  
365 help to further investigate the  $\Delta$  brain embedding and its ability to capture subtle  
366 biological processes like pubertal maturation. With additional longitudinal data one  
367 would also expect to have access to more datapoints that represent male participants  
368 in later pubertal stages potentially allowing to better disentangle the putative brain

369 trajectories encoded by the  $\Delta$  brain embedding. While studies on normative brain  
370 development generally report overarching brain trajectories across different brain  
371 measures<sup>40</sup>, recent work by Bottenhorn and colleagues<sup>41</sup> highlight a high degree of  
372 intra- and interindividual variability in brain maturation across imaging measures.  
373 Identifying and understanding these sources of variance depict an important step  
374 towards population-level neuroscience, which however may complicate downstream  
375 analyses because of the heterogeneity across regions and imaging measures.  
376 Because of its sensitivity to pubertal processes shaping the human brain, we suggest  
377 that our approach may help to unify those different sources of variance into a  
378 condensed score that does not only serve as a dimension reduction technique but  
379 places individuals in a biologically meaningful feature space.

380

381 Since puberty is a critical time window for emerging mental disorders<sup>24,31,32</sup>, we aimed  
382 at additionally exploiting the models predictions as a 'normative' score and tested its  
383 association to psychopathology in the HBN sample. In females only, we observed  
384 small yet significant effects of psychopathology severity on the brain embedding score.  
385 By accounting these analyses for age, we ruled out that these associations simply  
386 mimic a larger number of diagnoses with increasing age. Since descriptive statistics  
387 of the number of diagnoses were almost identical across sexes (Supplementary Fig.  
388 6), we deem it unlikely that such subtle variances might have driven differences in  
389 association strength. A more likely explanation might be the diagnoses themselves, as  
390 we observed diagnosis distributions matching the known patterns of more male-  
391 prevalent (e.g., ADHD) vs. more female-prevalent (e.g., mood or anxiety) disorders.  
392 Thus, it may be possible that the derived brain embeddings are more sensitive to  
393 female-prevalent disorders. Even though puberty associations did not reach statistical  
394 significance in the HBN sample, they pointed towards higher effects in females. As  
395 many female-typical mental disorders emerge during puberty<sup>42</sup> our brain embedding  
396 may also have a higher sensitivity towards those disorders. However, since we were  
397 not able to test this directly because of sample size restrictions, this line of reasoning  
398 should be considered as hypothesis generating and needs to be investigated in future  
399 research. When extending the model with pubertal variables, we did not observe  
400 additional effects, which may be related to prevalence of emerging psychopathology  
401 in the HBN sample, which may interfere with puberty and may thus explain, why we

402 were not able to replicate the cross-sectional puberty associations in the HBN sample.  
403 Furthermore, subsampling the HBN sample to the respective age ranges of the ABCD  
404 visits decreased the available sample size in a way that has not sufficient statistical  
405 power to detect small to moderate effects.

406  
407 We acknowledge that the sum of diagnoses in the HBN sample rather depicts a coarse  
408 measure of psychopathology, however, by expanding our work with a dimensional  
409 measure (the CBCL total psychopathology score), we did observe similar associations.  
410 Furthermore, both measures were moderately correlated ( $r \sim .3$ ) supporting our initial  
411 approach to operationalize sum of diagnosis as a measure of psychopathology  
412 severity. Future research may leverage more fine-grained quantities, such as  
413 hierarchical representations of psychopathology (HiTOP<sup>43</sup>) or different syndrome  
414 scales to better disentangle associations between the ( $\Delta$ ) brain embedding score and  
415 emerging mental health conditions during puberty. For example, dimensional  
416 approaches may further help to investigate whether the brain embedding scores are  
417 sensitive to capture neuronal traces of early pubertal timing (e.g., early menarche in  
418 females<sup>44</sup> and their relationship to internalizing psychopathology<sup>45</sup>). To overcome  
419 sample size restrictions often observed in clinical samples, leveraging the longitudinal  
420 data from ABCD may further help to investigate the marker's sensitivity to capture  
421 refined, but biologically meaningful, mental health processes related to brain  
422 dynamics<sup>46</sup>. Our validation analyses in the ABCD sample yielded small – yet significant  
423 – effect for the psychopathology associations, indicating that our model may also be  
424 sensitive to subtle psychopathological manifestations that do not (yet) exceed a clinical  
425 threshold. These initial results suggest that our approach may also render useful to  
426 study psychopathology in future releases of the ABCD sample.

427

### 428 *Limitations and Future Directions*

429 Potential limitations might stem from the fact that only two imaging modalities, that is  
430 brain volume and surface area, were integrated in our framework. Since brain volume  
431 and area follow a comparable normative developmental trajectory from late childhood  
432 into late adolescence<sup>40</sup>, building similarity networks on both measures may result in  
433 robust and non-sparse reference space that allows to better disentangle sex effects,  
434 since additional heteroscedasticity of different imaging measures may be mitigated<sup>41</sup>.

435 However, beyond the proof-of-concept of the current study, we nevertheless deem it  
436 important to extend our approach with additional (imaging) modalities to tests its  
437 generalizability beyond the two imaging features. Furthermore, integrating additive  
438 data sources may result in a more holistic (i.e., multimodal) phenotype representing  
439 brain development or dynamics which may help to explain additional variance in  
440 behavioral or mental health measures and thus may substantiate the brain embedding  
441 score utility in capturing brain trajectories. In addition, focusing on more than the first  
442 brain embedding might also help to explain additional variance in the tested  
443 associations. However, we consider it essential for future work to systematically test  
444 how modality-specific information is encoded in the brain embeddings before testing if  
445 later embeddings contain biologically meaningful between or within subject variances.  
446 Lastly, since our model results in a single brain embedding score, our current approach  
447 is limited in its spatial interpretability. While univariate analyses may yield the highest  
448 interpretability, they come at the cost of methodological hurdles, such as  
449 multicollinearity, high dimensionality, or conflicting feature importance despite similar  
450 model performances (e.g.,<sup>47,48</sup>). Beyond those hurdles, modeling brain maturation and  
451 sex differences introduces additional variance, which might be difficult to model in an  
452 univariate fashion<sup>41,49</sup>. Our approach of integrating high-dimensional data into a single  
453 score may facilitate the modeling of developmental slopes and might thus be better  
454 suitable for tracking within-subject changes. To address limitations in interpretability,  
455 we provided brain maps illustrating the correlation of each brain feature to the brain  
456 embedding (Supplementary Fig. 1). Similarity in these maps between cohorts supports  
457 robustness of the observed patterns. Other approaches, such as feature deletion<sup>50</sup>  
458 may further increase post-hoc interpretability.

459

460

#### 461 *Conclusion*

462 We introduced a novel approach which allows to integrate high dimensional imaging  
463 data into a coherent feature space in which subjects can be localized by a single brain  
464 embedding score. We suggest that transferring this mapping to other datasets results  
465 in a new imaging phenotype which inherits a sensitivity to capture meaningful and  
466 biologically relevant processes shaping human brain dynamics.



## 467 **Methods**

468

### 469 **Sample Descriptions**

470

#### 471 **PNC**

472 As source model we used imaging data from the Philadelphia Neurodevelopmental  
473 Cohort (PNC), a large-scale cross-sectional population study of child and youth  
474 between 8- and 21-years age dedicated to study (brain) development. All PNC study  
475 procedures were approved by institutional review boards of the University of  
476 Pennsylvania and the Children`s Hospital of Philadelphia. All participants or their  
477 caregiver provided written informed consent. Data in the PNC sample was acquired  
478 from a single site<sup>13</sup>. We included data from N=1594 individuals with available T1-  
479 weighted imaging (females= 834, age:  $M= 14.95$ ,  $SD= 3.69$ ). We used brain area and  
480 volume of 68 cortical brain regions matching the Desikan-Killiany atlas<sup>51</sup> estimated  
481 from T1 MRI images using FreeSurfer (version 7.1.1)<sup>52</sup>.

482

483

#### 484 **ABCD**

485 The Adolescent Brain Cognitive Development (ABCD) Study is a 10-year longitudinal  
486 study of children recruited at age 9 to 10 aiming at characterizing brain developmental  
487 trajectories. Overall ~11.000 children were recruited across 21 different sites in the  
488 United States<sup>14</sup>. Study procedures have been approved by either the local site  
489 Institutional Review Board (IRB) or by local IRB reliance agreements with the central  
490 IRB at the University of California. All participants and their parents provided written  
491 informed consent. Data for the current study was obtained from ABCD release 4.0  
492 utilizing phenotypic and imaging data from the baseline and 2-years follow up study  
493 visit. Preprocessed imaging data from the Desikan-Killiany atlas (68 regions)<sup>51</sup> were  
494 downloaded from the NIMH data archive. Since we were interested in the longitudinal  
495 data, we included only children having MRI data from both baseline and 2-years follow  
496 up visit (N=7776, females= 3587, age<sub>baseline</sub>:  $M= 9.90$ ,  $SD= .62$ ; age<sub>follow-up</sub>:  $M= 11.90$ ,  
497  $SD= .65$ ).

498

## 499 **HBN**

500 The Healthy Brain Network (HBN) is a community sample of children and adolescent  
501 (ages 5 – 21) in the New York area aiming at capturing and investigating the  
502 heterogeneity in developmental psychopathology and its biological underpinnings<sup>15</sup>.  
503 Imaging data was acquired across four different scanning sites and study procedures  
504 were approved by the Chesapeake IRB. All participants or their caregiver provided  
505 written informed consent. Brain area and volume of 68 cortical brain regions from T1  
506 MRI images were estimated according to the Desikan-Killiany atlas<sup>51</sup> using FreeSurfer  
507 (version 7.1.1)<sup>52</sup>. Based on clinical diagnostic information and the presence of a  
508 primary diagnosis, we integrated data from N= 2271 (females= 784, age:  $M= 10.43$ ,  
509  $SD= 3.45$ ) participants.

510

511

## 512 **Model Building and Testing**

513 Brain volume and area from the Desikan-Killiany atlas<sup>51</sup> were used to construct fused  
514 similarity networks with *snfpy* (version 0.2.2, <https://github.com/rmarkello/snfpy>). In the  
515 following we will briefly describe the SNF workflow but refer the reader to Wang et al.<sup>8</sup>  
516 for a more detailed description: First, we generated subject x subject affinity networks  
517 for MRI area and volume by converting between-subject (squared euclidean) distances  
518 to similarities with a scaled exponential kernel, respectively. Next, SNF iteratively fused  
519 each feature affinity matrix resulting into one symmetric similarity matrix integrating  
520 information from all data sources. Both previous steps are governed by the  
521 hyperparameters  $K$  (i.e., the number of neighbors to consider) and  $\mu$  (i.e., weighting of  
522 between subjects' edges) with  $K \in [1, 2, \dots, i]$ ,  $i \in \mathbb{Z}$  and  $\mu \in \mathbb{R}^+$ . Markello et al.<sup>6</sup>  
523 performed a grid-search across 10.000 hyperparameter combinations and reported  
524 consistent embeddings across all combinations ( $r_{\text{mean}}= .97$ ), suggesting a neglectable  
525 effect of extensive hyperparameter tuning for consecutive analyses aiming at  
526 continuous representations. We thus set  $K= 30$  and  $\mu= 0.8$  in accordance with the  
527 suggested range of values in *snfpy*. The fused matrix is full rank and can then be either  
528 subjected to clustering or dimensionality reduction to achieve continuous  
529 representation of the data in a low-dimensional space. Since we were interested in the  
530 latter, we performed diffusion map embedding on the fused network to derive low-  
531 dimensional representations of the imaging data using *BrainSpace* (version 0.1.3)<sup>53</sup>.

532 Diffusion map embedding is a non-linear dimensionality reduction technique that  
533 projects the raw data onto dimensions (i.e., brain embeddings) that encode the primary  
534 axes of between-subject similarity. The resulting embeddings are unitless and subjects  
535 can be localized according to their inter-subject similarity along these dimensions<sup>6</sup>.  
536 Critically, diffusion map embedding has been shown to be sensitive to non-linear  
537 relationships and robust against noise perturbations compared to other techniques,  
538 such as Principal Component Analyses (PCA)<sup>10,54</sup>. The diffusion time parameter  $t$  was  
539 set to zero to model the most global relationship of the input data<sup>10</sup>. For further  
540 analyses the first brain embedding was used, as it captures the highest variance akin  
541 to PCA.

542  
543 For our machine learning framework we then trained an Elastic Net in scikit-learn  
544 (version 1.0.2)<sup>55</sup> to learn the mappings between the raw feature space (i.e., area and  
545 volume MRI data, each with shape 1594 x 34 after averaging features across both  
546 hemispheres) and the first brain embedding. Since our goal was to maximize out of  
547 sample generalizability, we 1) trained the model with default parameters (l1\_ratio = 0.5  
548 balancing L1 and L2 norm regularization, alpha= 1.0 which tunes the overall penalty  
549 strength) aiming at minimizing overfitting to the training set and 2) utilized an instance-  
550 based supervised domain adaptation (Transfer AdaBoost for Regression;  
551 TrAdaBoostR2)<sup>28</sup> implemented in ADAPT (version 0.4.1)<sup>56</sup>. TrAdaBoostR2 combines  
552 a source (PNC) and target data set into a single set and performs reverse boosting in  
553 which weights of the source instances poorly predicted decrease at each iteration while  
554 the ones of the target instances increases, thus shifting the relative importance towards  
555 the target set<sup>28</sup>. Thus, the algorithm makes use of those source instances that are  
556 similar to the target domain and “ignores” the ones that are more dissimilar. Since  
557 increasing the boosting iterations may lead to overfitting, the algorithm per default uses  
558 the weighted median of the last  $N/2$  iterations for prediction. To avoid data leakage, we  
559 used held-out data from the ABCD and HBN: For the ABCD data we used  $N= 3984$   
560 (females= 2027, age:  $M= 9.95$ ,  $SD= .63$ ) children for which only baseline imaging data  
561 was available at release 4.0. In the HBN sample we used imaging data from a healthy  
562 sample of  $N=389$  (females= 162, age:  $M= 10.45$ ,  $SD= 3.81$ ) for which no primary  
563 diagnosis was reported. Of note, for the latter we did pool subjects with the label ‘no  
564 diagnoses’ either based on a complete or aborted evaluation. For both datasets we

565 used brain volume and area from the Desikan-Killiany atlas<sup>51</sup>. Since MRI data was  
566 acquired on different scanners both for the ABCD and HBN data, we harmonized both  
567 the volume and area imaging data individually using *neuroCombat* (version 0.2.12)<sup>57</sup>.  
568 Of note, for the ABCD data, batch correction was performed on individual timepoints  
569 and separated for train and test set.

570 After fitting with domain adaptation, we applied the model to unseen test data from the  
571 ABCD and HBN, respectively. To quantify the quality of predictions we additionally also  
572 performed SNF and diffusion map embedding on the ABCD and HBN test sample and  
573 calculated error metrics (MSE; MAE; RMSE) and  $R^2$  and correlation values between  
574 the predicted and 'true' first brain embedding after orthogonal Procrustes alignment  
575 with *mapalign* (version 0.3.0, <https://github.com/satra/mapalign>)<sup>58</sup>. A schematic  
576 representation of the workflow is depicted in Figure 1A. Additionally, Supplementary  
577 Fig. 1 depict the correlation between the raw features and the first brain embedding in  
578 the HBN and ABCD sample, respectively.

579

## 580 **Modelling Puberty**

581 Pubertal development in the ABCD and HBN sample was assessed with the Pubertal  
582 Development Scale (PDS) which was designed to resemble the Tanner stages without  
583 the need of a physical examination<sup>30,38</sup>. The child's pubertal development is rated on  
584 a four-point Likert scale ranging from 'has not begun' to 'completed' with one exception,  
585 that is a binary response item regarding females' menarche. Overall, there are general  
586 and sex-specific items that are administered with respect to the biological sex, e.g.,  
587 voice-deepening or breast development. The rating can be conducted by the children  
588 or their caregivers, thus reflecting self or other-perceived pubertal maturation. In the  
589 ABCD study both children and caregiver report are available for both timepoints<sup>38</sup>,  
590 whereas in the HBN study only participant responses are available<sup>15</sup>. Individual item  
591 scores were used to calculate the average PDS score ( $PDS_{\text{mean}}$ ) in line with procedure  
592 described in Herting et al.<sup>37</sup>. For longitudinal associations, we additionally calculated a  
593  $\Delta PDS$  score as a marker for pubertal maturation, that is the difference between  
594 baseline and 2-years follow up PDS score. Moreover, pubertal category scores were  
595 derived for males and females. For males, the sum of three items related to pubic and  
596 facial hair growth as well as voice deepening was calculated. For females, pubic hair  
597 growth and breast development was summed and information about the menarche

598 was additionally incorporated. Eventually, pubertal scores were converted into pubertal  
599 categories ranging from prepubertal to post pubertal based on the ABCD conversion  
600 scheme (see Supplementary Table 3). The frequency of pubertal categories for the  
601 baseline and follow-up data is shown in Supplementary Table 4. PDS<sub>mean</sub> scores were  
602 also calculated in the HBN sample to test for out-of-sample replicability and  
603 generalizability.

604

### 605 **Modelling Psychopathology**

606 In the HBN sample each participant and their caregiver underwent an online version  
607 of a semi-structured DSM-5 based psychiatric interview (K-SADS)<sup>59</sup> to derive clinical  
608 diagnoses. Consensus diagnoses for each participant are made based on the overlap  
609 of the child and caregiver interview by a research clinician<sup>15</sup>. We calculated the sum of  
610 all consensus diagnoses per subject as a proxy for psychopathology severity.  
611 Frequencies of psychopathology measures can be derived from Supplementary Table  
612 5.

613

614

### 615 **Association Analyses**

616 All association analyses were performed with *statsmodels* (version 0.13.2)<sup>60</sup>. To test  
617 for associations between pubertal development and the predicted brain embeddings  
618 in the ABCD study, we implemented linear models for each timepoint (i.e., baseline  
619 and 2-year follow up) with the respective brain embedding as dependent variable (DV)  
620 and the PDS<sub>mean</sub> score as independent variable (IV) with two-sided significance testing.  
621 For all associations we additionally report partial-eta-squared ( $\eta^2$ ) per predictor of  
622 interest. Since we were particularly interested whether the difference between both  
623 brain embeddings ( $\Delta$  brain embedding) captures biological variance that is associated  
624 to brain dynamics, we performed an additional linear model with  $\Delta$  brain embedding as  
625 DV and the  $\Delta$ PDS<sub>mean</sub> score as IV. Analyses were stratified for sex and youth and  
626 caregiver reports accounting for differences how pubertal development might be  
627 perceived<sup>38</sup>. Despite the rather narrow age range at each study visit, age or  $\Delta$ age (i.e.,  
628 the difference in age between baseline and 2 years follow-up accounting for variance  
629 in between-visit durations) was added as a covariate to the linear model in ABCD, to  
630 rule out that putative pubertal effects merely represent aging effects. For the ABCD

631 sample the number of observations varies between models as the amount of missing  
632 data is different per timepoint and depends on whether the participants themselves or  
633 their caregiver provided the data. In the HBN sample, we tested the association  
634 between the predicted brain embedding (DV) and the sum of diagnoses (IV), which we  
635 introduced as a proxy for psychopathology severity. Based on the close relationship  
636 between puberty and emerging mental disorders, we additionally calculated linear  
637 models which included both the summed diagnoses and the PDS<sub>mean</sub> score as IVs and  
638 one model containing an interaction term summed diagnoses: PDS<sub>mean</sub> score next to  
639 the main effects. PDS<sub>mean</sub> score was based on participant reports. For the HBN sample  
640 the number of observations varies between models as missing data was excluded on  
641 a model-by-model bases, i.e., dependent on the IVs of interest. Linear models were  
642 stratified for sex and age and site were added as covariates of no interest. All linear  
643 models were Bonferroni corrected for multiple comparisons<sup>61</sup>.

644

#### 645 **Data Availability**

646 Data incorporated in this work were gathered from various resources (see  
647 acknowledgements) and are shared under data use agreements of the respective  
648 cohorts.

649

#### 650 **Code Availability**

651 All code used in this manuscript is available on github  
652 ([https://github.com/dominikkraft/DomAdapt\\_BrainNetFusion](https://github.com/dominikkraft/DomAdapt_BrainNetFusion)) and builds upon python  
653 3.7.11. Basic data handling relied on *pandas* (version 1.3.5)<sup>62</sup> and *numpy* (version  
654 1.21.5)<sup>63</sup>. Data visualization relied on *matplotlib* (version 3.5.1)<sup>64</sup> and *seaborn* (version  
655 0.11.2)<sup>65</sup>.

656

657 **References**

- 658 1. Huys, Q. J. M., Maia, T. V. & Frank, M. J. Computational psychiatry as a  
659 bridge from neuroscience to clinical applications. *Nat. Neurosci.* 19, 404–413  
660 (2016).
- 661 2. Arango, C. *et al.* Risk and protective factors for mental disorders beyond  
662 genetics: an evidence-based atlas. *World Psychiatry* 20, 417–436 (2021).
- 663 3. Fernandes, B. S. *et al.* The new field of ‘precision psychiatry’. *BMC Med.* 15,  
664 80 (2017).
- 665 4. Prince, M. *et al.* No health without mental health. *The Lancet* 370, 859–877  
666 (2007).
- 667 5. Ganguli, S. & Sompolinsky, H. Compressed Sensing, Sparsity, and  
668 Dimensionality in Neuronal Information Processing and Data Analysis. *Annu.*  
669 *Rev. Neurosci.* 35, 485–508 (2012).
- 670 6. Markello, R. D. *et al.* Multimodal phenotypic axes of Parkinson’s disease. *Npj*  
671 *Park. Dis.* 7, 6 (2021).
- 672 7. Zitnik, M. *et al.* Machine learning for integrating data in biology and medicine:  
673 Principles, practice, and opportunities. *Inf. Fusion* 50, 71–91 (2019).
- 674 8. Wang, B. *et al.* Similarity network fusion for aggregating data types on a  
675 genomic scale. *Nat. Methods* 11, 333–337 (2014).
- 676 9. Hong, S.-J. *et al.* Toward Neurosubtypes in Autism. *Biol. Psychiatry* 88, 111–  
677 128 (2020).
- 678 10. Coifman, R. R. *et al.* Geometric diffusions as a tool for harmonic analysis and  
679 structure definition of data: Diffusion maps. *Proc. Natl. Acad. Sci.* 102, 7426–  
680 7431 (2005).
- 681 11. Gillan, C. M., Kosinski, M., Whelan, R., Phelps, E. A. & Daw, N. D.  
682 Characterizing a psychiatric symptom dimension related to deficits in goal-  
683 directed control. *eLife* 5, e11305 (2016).
- 684 12. Parkes, L. *et al.* Transdiagnostic dimensions of psychopathology explain  
685 individuals’ unique deviations from normative neurodevelopment in brain  
686 structure. *Transl. Psychiatry* 11, 232 (2021).
- 687 13. Satterthwaite, T. D. *et al.* The Philadelphia Neurodevelopmental Cohort: A  
688 publicly available resource for the study of normal and abnormal brain  
689 development in youth. *NeuroImage* 124, 1115–1119 (2016).

- 690 14. Casey, B. J. *et al.* The Adolescent Brain Cognitive Development (ABCD)  
691 study: Imaging acquisition across 21 sites. *Dev. Cogn. Neurosci.* 32, 43–54  
692 (2018).
- 693 15. Alexander, L. M. *et al.* An open resource for transdiagnostic research in  
694 pediatric mental health and learning disorders. *Sci. Data* 4, 170181 (2017).
- 695 16. Blakemore, S.-J., Burnett, S. & Dahl, R. E. The role of puberty in the  
696 developing adolescent brain. *Hum. Brain Mapp.* 31, 926–933 (2010).
- 697 17. Vijayakumar, N., Op de Macks, Z., Shirtcliff, E. A. & Pfeifer, J. H. Puberty and  
698 the human brain: Insights into adolescent development. *Neurosci. Biobehav.*  
699 *Rev.* 92, 417–436 (2018).
- 700 18. Suleiman, A. B., Galván, A., Harden, K. P. & Dahl, R. E. Becoming a sexual  
701 being: The ‘elephant in the room’ of adolescent brain development. *Dev.*  
702 *Cogn. Neurosci.* 25, 209–220 (2017).
- 703 19. Holm, M. C. *et al.* *Linking brain maturation and puberty during early*  
704 *adolescence using longitudinal brain age prediction in the ABCD cohort.*  
705 <http://medrxiv.org/lookup/doi/10.1101/2022.05.16.22275146> (2022)  
706 [doi:10.1101/2022.05.16.22275146](https://doi.org/10.1101/2022.05.16.22275146).
- 707 20. Beck, D. *et al.* *Puberty differentially predicts brain maturation in males and*  
708 *females during early adolescence: A longitudinal ABCD Study.*  
709 <http://medrxiv.org/lookup/doi/10.1101/2022.12.22.22283852> (2022)  
710 [doi:10.1101/2022.12.22.22283852](https://doi.org/10.1101/2022.12.22.22283852).
- 711 21. Wierenga, L. M. *et al.* A Key Characteristic of Sex Differences in the  
712 Developing Brain: Greater Variability in Brain Structure of Boys than Girls.  
713 *Cereb. Cortex N. Y. N 1991* 28, 2741–2751 (2018).
- 714 22. Dehestani, N., Whittle, S., Vijayakumar, N. & Silk, T. J. Developmental brain  
715 changes during puberty and associations with mental health problems. *Dev.*  
716 *Cogn. Neurosci.* 60, 101227 (2023).
- 717 23. Kaczurkin, A. N., Raznahan, A. & Satterthwaite, T. D. Sex differences in the  
718 developing brain: insights from multimodal neuroimaging.  
719 *Neuropsychopharmacology* 44, 71–85 (2019).
- 720 24. Pfeifer, J. H. & Allen, N. B. Puberty Initiates Cascading Relationships Between  
721 Neurodevelopmental, Social, and Internalizing Processes Across  
722 Adolescence. *Biol. Psychiatry* 89, 99–108 (2021).



- 723 25. Copeland, W. E., Worthman, C., Shanahan, L., Costello, E. J. & Angold, A.  
724 Early Pubertal Timing and Testosterone Associated With Higher Levels of  
725 Adolescent Depression in Girls. *J. Am. Acad. Child Adolesc. Psychiatry* 58,  
726 1197–1206 (2019).
- 727 26. Mendle, J. & Ferrero, J. Detrimental psychological outcomes associated with  
728 pubertal timing in adolescent boys. *Dev. Rev.* 32, 49–66 (2012).
- 729 27. Conley, C. S. & Rudolph, K. D. The emerging sex difference in adolescent  
730 depression: Interacting contributions of puberty and peer stress. *Dev.*  
731 *Psychopathol.* 21, 593–620 (2009).
- 732 28. Pardoe, D. & Stone, P. Boosting for Regression Transfer. in *Proceedings of*  
733 *the 27th International Conference on International Conference on Machine*  
734 *Learning* 863–870 (Omnipress, 2010).
- 735 29. Vijayakumar, N. *et al.* A longitudinal analysis of puberty-related cortical  
736 development. *NeuroImage* 228, 117684 (2021).
- 737 30. Petersen, A. C., Crockett, L., Richards, M. & Boxer, A. A self-report measure  
738 of pubertal status: Reliability, validity, and initial norms. *J. Youth Adolesc.* 17,  
739 117–133 (1988).
- 740 31. Dalsgaard, S. *et al.* Incidence Rates and Cumulative Incidences of the Full  
741 Spectrum of Diagnosed Mental Disorders in Childhood and Adolescence.  
742 *JAMA Psychiatry* 77, 155 (2020).
- 743 32. Paus, T., Keshavan, M. & Giedd, J. N. Why do many psychiatric disorders  
744 emerge during adolescence? *Nat. Rev. Neurosci.* 9, 947–957 (2008).
- 745 33. Marquand, A. F., Rezek, I., Buitelaar, J. & Beckmann, C. F. Understanding  
746 Heterogeneity in Clinical Cohorts Using Normative Models: Beyond Case-  
747 Control Studies. *Biol. Psychiatry* 80, 552–561 (2016).
- 748 34. Achenbach, T. M. The Child Behavior Checklist and related instruments. in  
749 *The use of psychological testing for treatment planning and outcomes*  
750 *assessment, 2nd ed.* 429–466 (Lawrence Erlbaum Associates Publishers,  
751 1999).
- 752 35. Sydnor, V. J. *et al.* Neurodevelopment of the association cortices: Patterns,  
753 mechanisms, and implications for psychopathology. *Neuron* 109, 2820–2846  
754 (2021).
- 755 36. Hoyt, L. T., Niu, L., Pachucki, M. C. & Chaku, N. Timing of puberty in boys and

- 756 girls: Implications for population health. *SSM - Popul. Health* 10, 100549  
757 (2020).
- 758 37. Herting, M. M. *et al.* Correspondence Between Perceived Pubertal  
759 Development and Hormone Levels in 9-10 Year-Olds From the Adolescent  
760 Brain Cognitive Development Study. *Front. Endocrinol.* 11, 549928 (2021).
- 761 38. Cheng, T. W. *et al.* A Researcher's Guide to the Measurement and Modeling  
762 of Puberty in the ABCD Study® at Baseline. *Front. Endocrinol.* 12, 608575  
763 (2021).
- 764 39. Oelkers, L. *et al.* Socioeconomic Status Is Related to Pubertal Development in  
765 a German Cohort. *Horm. Res. Paediatr.* 93, 548–557 (2020).
- 766 40. Bethlehem, R. A. I. *et al.* Brain charts for the human lifespan. *Nature* 604,  
767 525–533 (2022).
- 768 41. Bottenhorn, K. L., Cardenas-Iniguez, C., Mills, K. L., Laird, A. R. & Herting, M.  
769 M. *Profiling intra- and inter-individual differences in child and adolescent brain*  
770 *development*. <http://biorxiv.org/lookup/doi/10.1101/2022.12.19.521089> (2022)  
771 doi:10.1101/2022.12.19.521089.
- 772 42. GBD 2019 Mental Disorders Collaborators. Global, regional, and national  
773 burden of 12 mental disorders in 204 countries and territories, 1990–2019: a  
774 systematic analysis for the Global Burden of Disease Study 2019. *Lancet*  
775 *Psychiatry* 9, 137–150 (2022).
- 776 43. Conway, C. C., Forbes, M. K. & South, S. C. A Hierarchical Taxonomy of  
777 Psychopathology (HiTOP) Primer for Mental Health Researchers. *Clin.*  
778 *Psychol. Sci.* 10, 236–258 (2022).
- 779 44. Mendle, J., Ryan, R. M. & McKone, K. M. P. Age at Menarche, Depression,  
780 and Antisocial Behavior in Adulthood. *Pediatrics* 141, e20171703 (2018).
- 781 45. Barendse, M. E. A. *et al.* Multimethod assessment of pubertal timing and  
782 associations with internalizing psychopathology in early adolescent girls. *J.*  
783 *Psychopathol. Clin. Sci.* 131, 14–25 (2022).
- 784 46. Solmi, M. *et al.* Age at onset of mental disorders worldwide: large-scale meta-  
785 analysis of 192 epidemiological studies. *Mol. Psychiatry* 27, 281–295 (2022).
- 786 47. Rosenberg, M. D. & Finn, E. S. How to establish robust brain–behavior  
787 relationships without thousands of individuals. *Nat. Neurosci.* 25, 835–837  
788 (2022).

- 789 48. Del Giudice, M. *The Prediction-Explanation Fallacy: A Pervasive Problem in*  
790 *Scientific Applications of Machine Learning*. <https://osf.io/4vq8f> (2021)  
791 doi:10.31234/osf.io/4vq8f.
- 792 49. Wierenga, L. M., Bos, M. G. N., Van Rossenberg, F. & Crone, E. A. Sex  
793 Effects on Development of Brain Structure and Executive Functions: Greater  
794 Variance than Mean Effects. *J. Cogn. Neurosci.* 31, 730–753 (2019).
- 795 50. Scheinost, D. *et al.* Ten simple rules for predictive modeling of individual  
796 differences in neuroimaging. *NeuroImage* 193, 35–45 (2019).
- 797 51. Desikan, R. S. *et al.* An automated labeling system for subdividing the human  
798 cerebral cortex on MRI scans into gyral based regions of interest. *NeuroImage*  
799 31, 968–980 (2006).
- 800 52. Fischl, B. *et al.* Whole Brain Segmentation. *Neuron* 33, 341–355 (2002).
- 801 53. Vos de Wael, R. *et al.* BrainSpace: a toolbox for the analysis of macroscale  
802 gradients in neuroimaging and connectomics datasets. *Commun. Biol.* 3, 103  
803 (2020).
- 804 54. De la Porte, J., Herbst, B., Hereman, W. & Van Der Walt, S. An introduction to  
805 diffusion maps. in *Proceedings of the 19th symposium of the pattern*  
806 *recognition association of South Africa (PRASA 2008), Cape Town, South*  
807 *Africa* 15–25 (2008).
- 808 55. Pedregosa, F. *et al.* Scikit-learn: Machine Learning in Python. Preprint at  
809 <http://arxiv.org/abs/1201.0490> (2018).
- 810 56. de Mathelin, A., Deheeger, F., Richard, G., Mougeot, M. & Vayatis, N.  
811 ADAPT: Awesome Domain Adaptation Python Toolbox. Preprint at  
812 <http://arxiv.org/abs/2107.03049> (2021).
- 813 57. Fortin, J.-P. *et al.* Harmonization of cortical thickness measurements across  
814 scanners and sites. *NeuroImage* 167, 104–120 (2018).
- 815 58. Langs, G., Golland, P. & Ghosh, S. S. Predicting Activation Across Individuals  
816 with Resting-State Functional Connectivity Based Multi-Atlas Label Fusion. in  
817 *Medical Image Computing and Computer-Assisted Intervention -- MICCAI*  
818 *2015* (eds. Navab, N., Hornegger, J., Wells, W. M. & Frangi, A.) vol. 9350  
819 313–320 (Springer International Publishing, 2015).
- 820 59. Kaufman, J. *et al.* Schedule for Affective Disorders and Schizophrenia for  
821 School-Age Children-Present and Lifetime Version (K-SADS-PL): initial

- 822 reliability and validity data. *J. Am. Acad. Child Adolesc. Psychiatry* 36, 980–  
823 988 (1997).
- 824 60. Seabold, S. & Perktold, J. Statsmodels: Econometric and Statistical Modeling  
825 with Python. in 92–96 (2010). doi:10.25080/Majora-92bf1922-011.
- 826 61. Bonferroni, C. Teoria statistica delle classi e calcolo delle probabilita.  
827 *Pubblicazioni R Ist. Super. Sci. Econ. E Commerciali Firenze* 8, 3–62 (1936).
- 828 62. McKinney, W. Data Structures for Statistical Computing in Python. in 56–61  
829 (2010). doi:10.25080/Majora-92bf1922-00a.
- 830 63. Harris, C. R. *et al.* Array programming with NumPy. *Nature* 585, 357–362  
831 (2020).
- 832 64. Hunter, J. D. Matplotlib: A 2D Graphics Environment. *Comput. Sci. Eng.* 9, 90–  
833 95 (2007).
- 834 65. Waskom, M. seaborn: statistical data visualization. *J. Open Source Softw.* 6,  
835 3021 (2021).
- 836
- 837
- 838
- 839

840 **Acknowledgements**

841

842 Authors DK and TK were funded by the Faculty of Medicine, University of Tübingen. TK was  
843 also funded by the Research Council of Norway (# 323961). D.A. was funded by the South-  
844 Eastern Norway Regional Health Authority (#2019107, #2020086). TK is a member of the  
845 Machine Learning Cluster of Excellence, EXC number 2064/1 – Project number 39072764.

846

847 This work was supported by the BMBF-funded de.NBI Cloud within the German Network for  
848 Bioinformatics Infrastructure (de.NBI) (031A537B, 031A533A, 031A538A, 031A533B,  
849 031A535A, 031A537C, 031A534A, 031A532B). The authors used data from the Philadelphia  
850 Neurodevelopmental Cohort (PNC, [https://www.ncbi.nlm.nih.gov/projects/gap/cgi-  
851 bin/study.cgi?study\\_id=phs000607.v3.p2](https://www.ncbi.nlm.nih.gov/projects/gap/cgi-bin/study.cgi?study_id=phs000607.v3.p2), access permission no 29782), the Adolescent Brain  
852 Cognitive Development<sup>SM</sup> Study (ABCD, [abcdstudy.org](http://abcdstudy.org)), and the Healthy Brain Networks  
853 (HBN, [data.healthybrainnetwork.org](http://data.healthybrainnetwork.org)). Support for the collection of the PNC data set was  
854 provided by grant #RC2MH089983 awarded to Raquel Gur, MD, PhD, and #RC2MH089924  
855 awarded to Hakon Hakonarson, MD, PhD. ABCD data, held in the NIMH Data Archive (NDA),  
856 is a multisite, longitudinal study designed to recruit more than 10,000 children age 9-10 and  
857 follow them over 10 years into early adulthood. The ABCD Study® is supported by the National  
858 Institutes of Health and additional federal partners under award numbers U01DA041048,  
859 U01DA050989, U01DA051016, U01DA041022, U01DA051018, U01DA051037,  
860 U01DA050987, U01DA041174, U01DA041106, U01DA041117, U01DA041028,  
861 U01DA041134, U01DA050988, U01DA051039, U01DA041156, U01DA041025,  
862 U01DA041120, U01DA051038, U01DA041148, U01DA041093, U01DA041089,  
863 U24DA041123, U24DA041147. A full list of supporters is available at  
864 <https://abcdstudy.org/federal-partners.html>. A listing of participating sites and a complete  
865 listing of the study investigators can be found at [https://abcdstudy.org/consortium\\_members/](https://abcdstudy.org/consortium_members/).  
866 PNC, HBN, and ABCD consortium investigators designed and implemented the respective  
867 studies and/or provided data but did not participate in the analysis or writing of this report. This  
868 manuscript reflects the views of the authors and does not necessarily reflect the opinions or  
869 views of any other agency, organization, employer or company.

870

871

872 **Author Contributions**

873

874 Dominik Kraft: Conceptualization; Data curation; Formal analysis; Investigation;  
875 Methodology; Project administration; Software; Visualization; Writing – original draft; Writing  
876 – review, editing, and approval of the paper.

877 Dag Alnæs: Data curation, Writing – review, editing and approval of the paper.

878 Tobias Kaufmann: Conceptualization; Project administration; Methodology, Funding  
879 acquisition, Writing – original draft; Writing – review, editing, and approval of the paper.

880

881

882 **Competing Interests**

883

884 The authors report no conflict of interest.

885

886
